# Supplementary material for: Digging deeper: new gene order rearrangements and distinct patterns of codons usage in mitochondrial genomes among shrimps from the Axiidea, Gebiidea and Caridea (Crustacea: Decapoda)
Source: PeerJ journal article supplement (doi:10.7717/peerj.2982), 2017-03-01

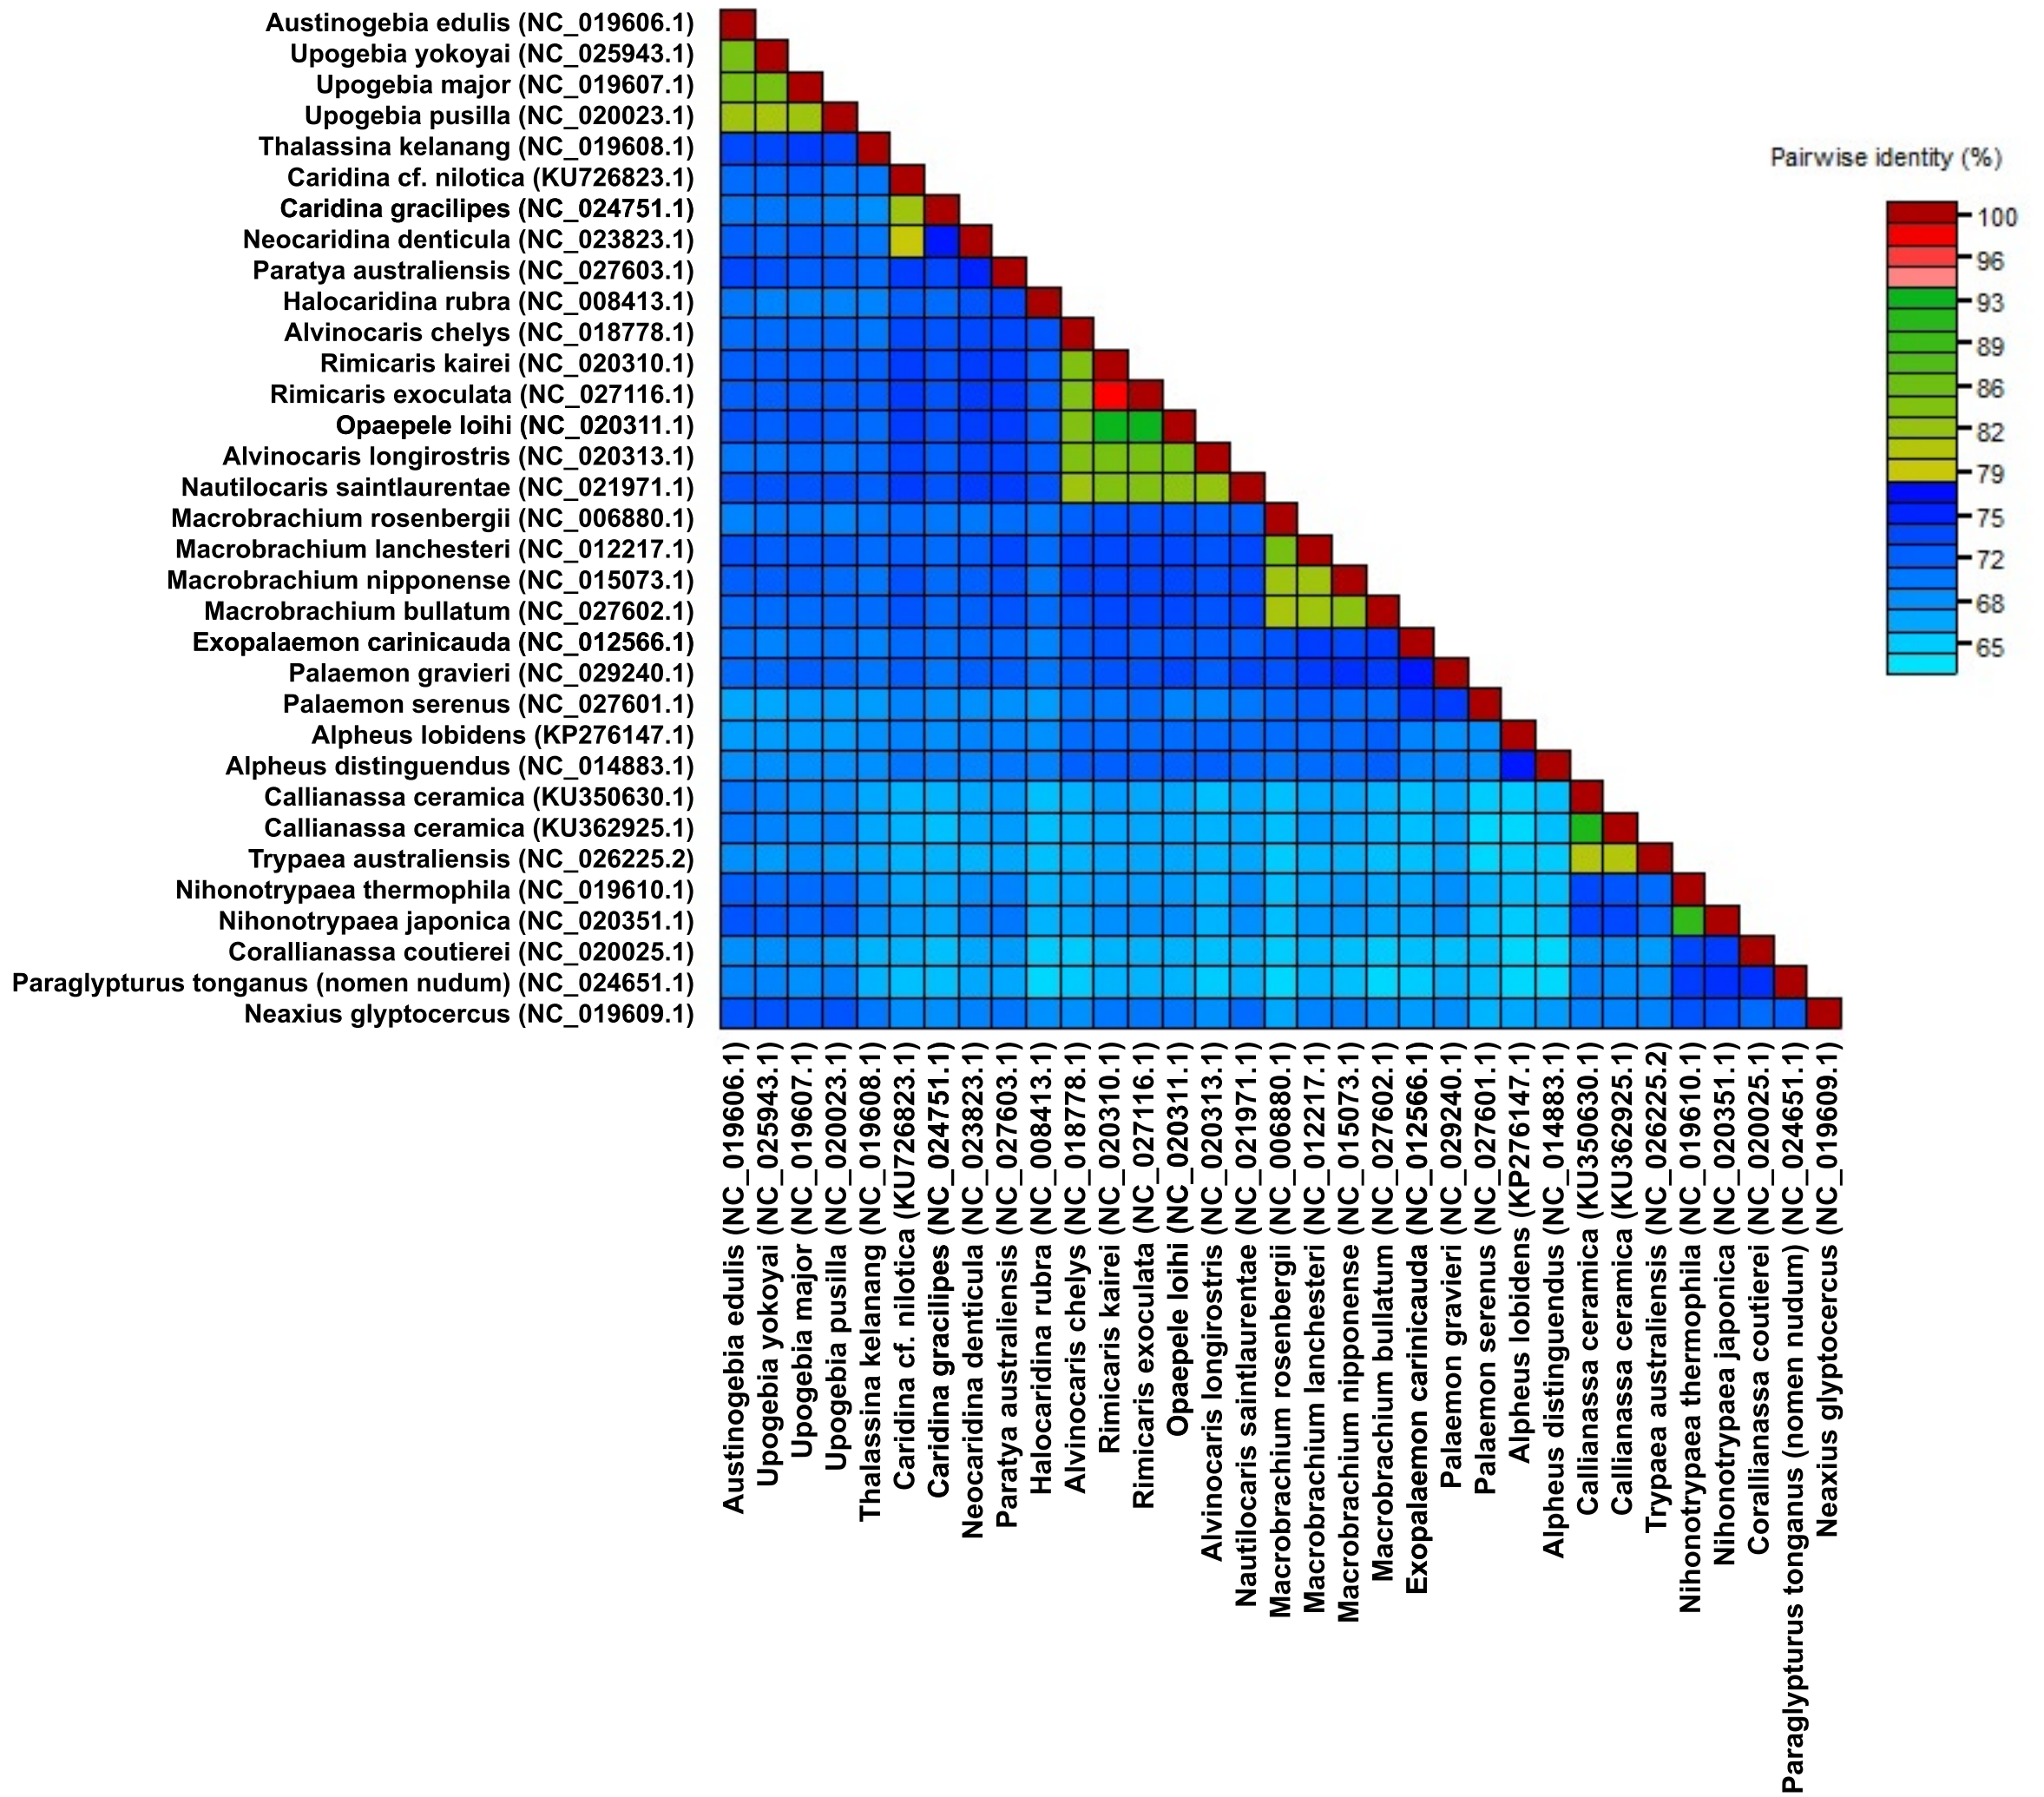

Supplement: Figure_S1.pdf [file Figure_S1.pdf]
