# Supplementary material for: Digging deeper: new gene order rearrangements and distinct patterns of codons usage in mitochondrial genomes among shrimps from the Axiidea, Gebiidea and Caridea (Crustacea: Decapoda)
Source: PubMed Central journal article supplement (PMC5335691; doi:10.7717/peerj.2982), 2017-03-01

# 13 PCG (aa) – ML

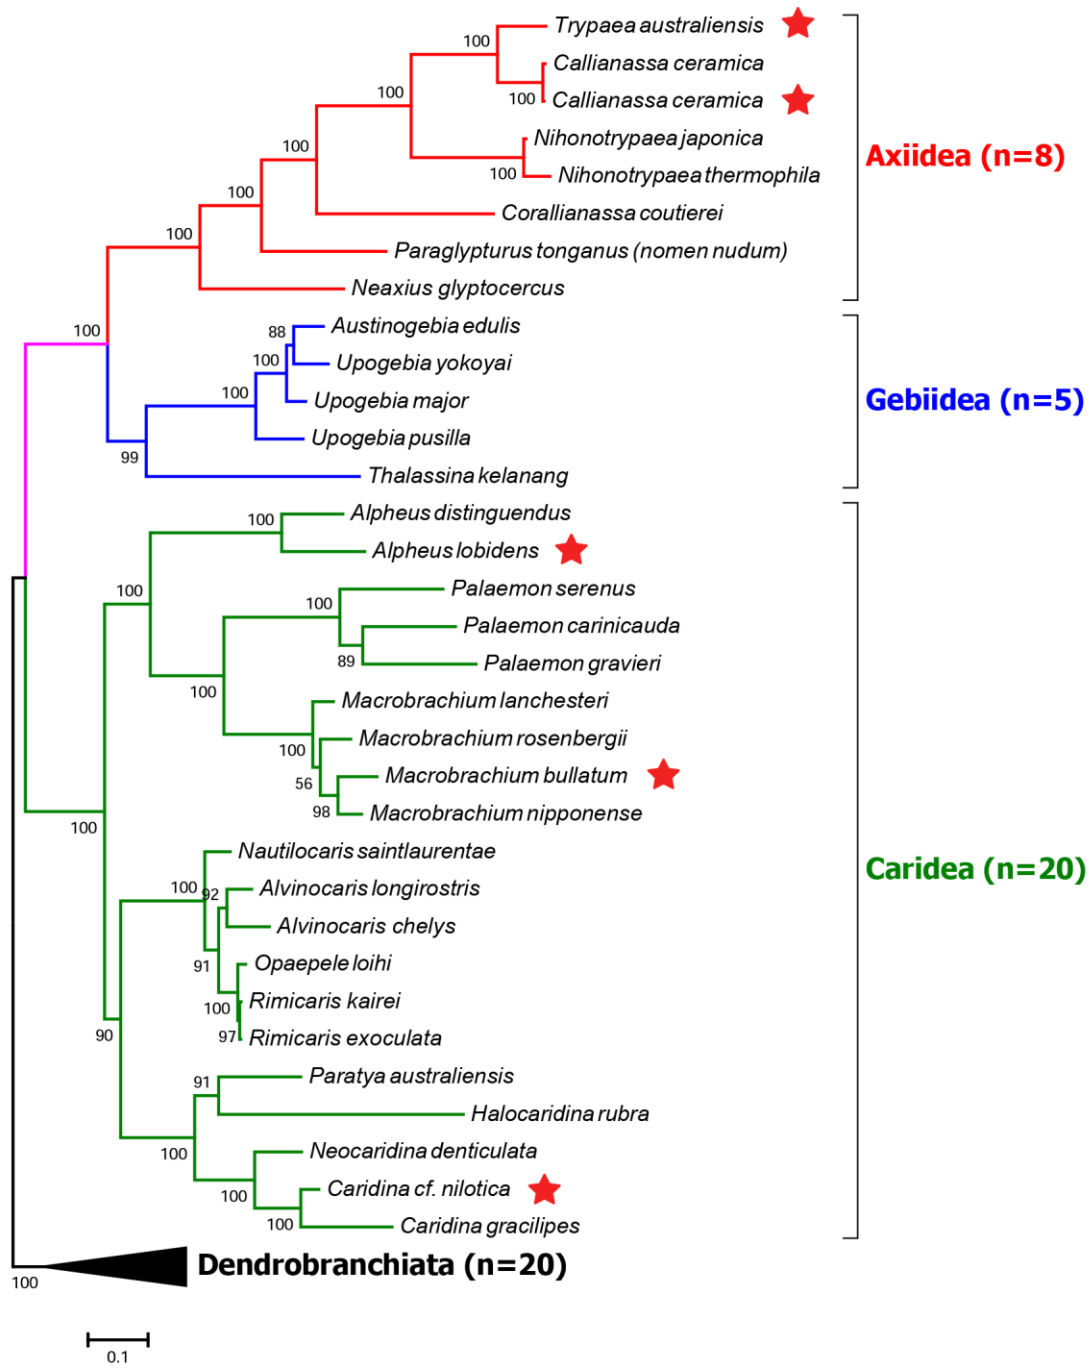

# 13 PCG (aa) – BI

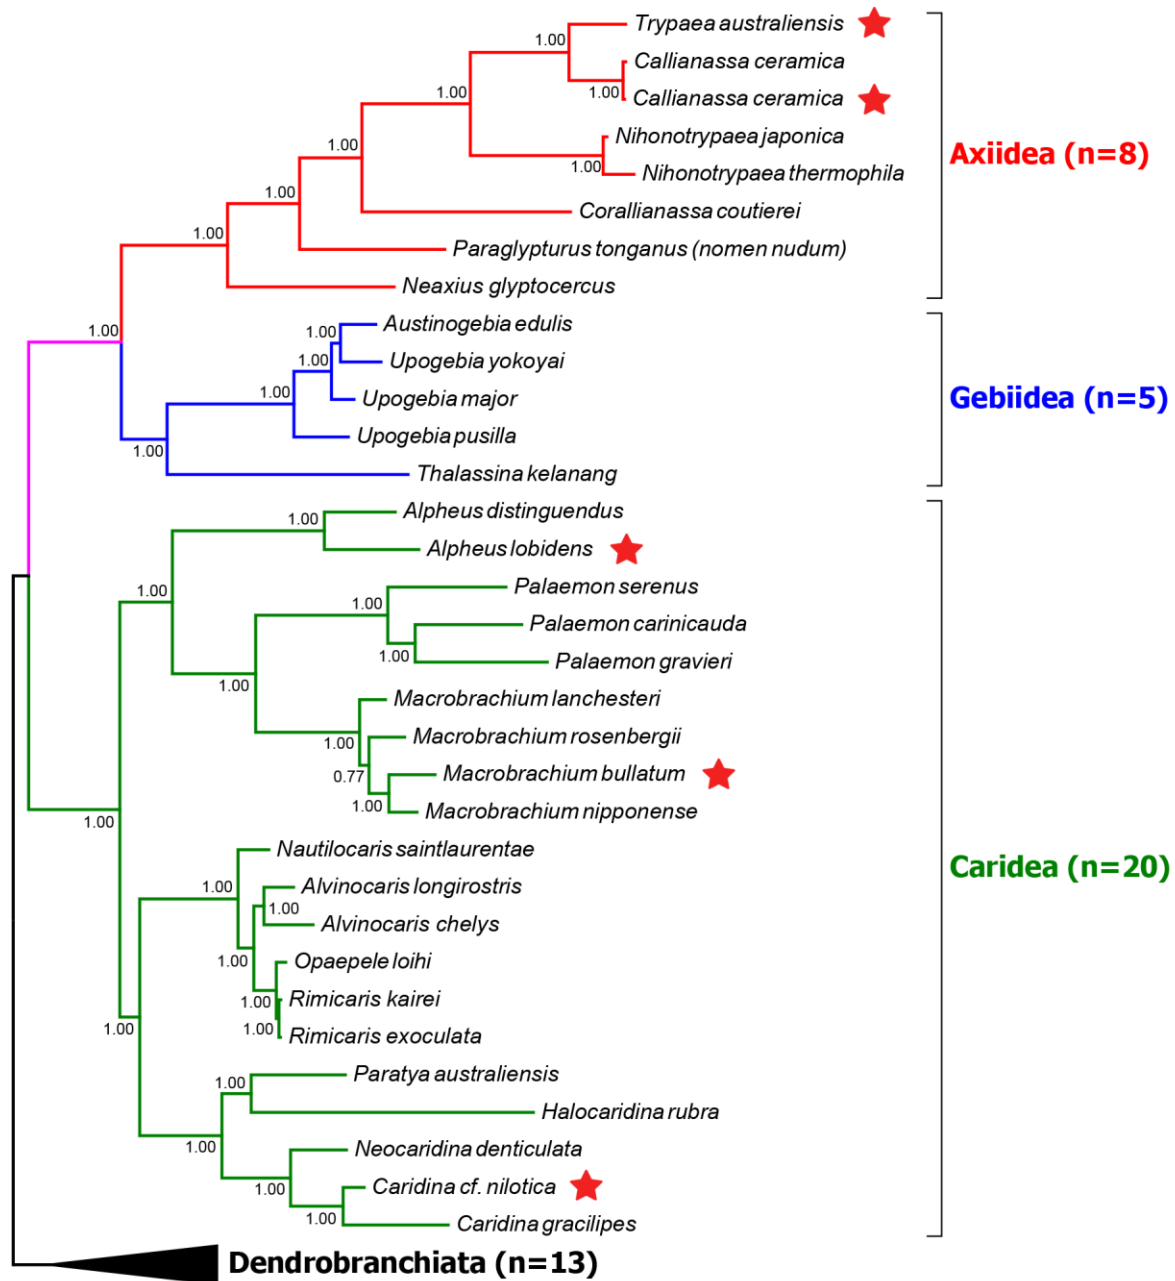

0.1

# 13 PCG (nt) – ML

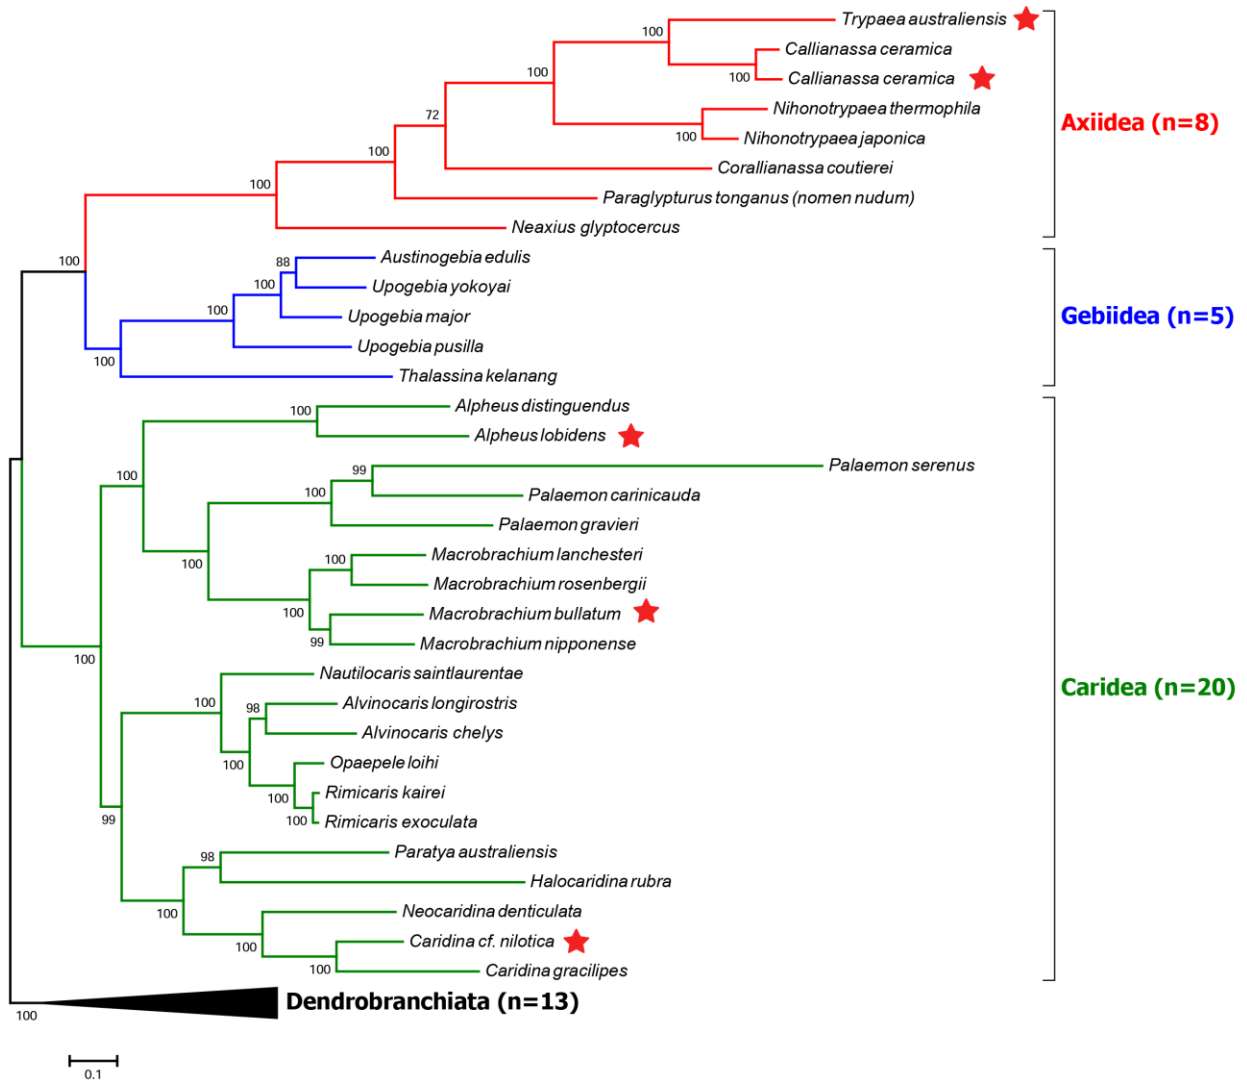

# 13 PCG (nt) – BI

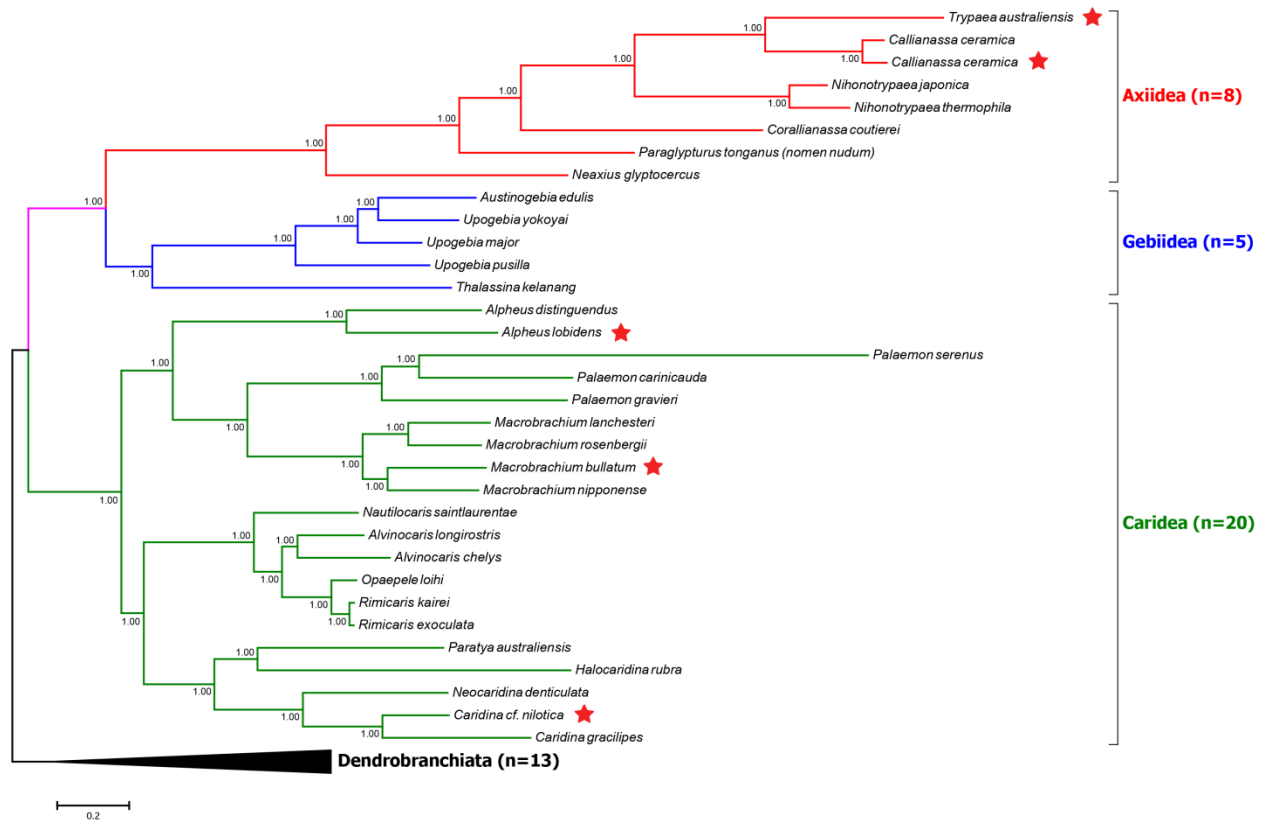

### 13 PCG (nt) – partitioned by codon – ML

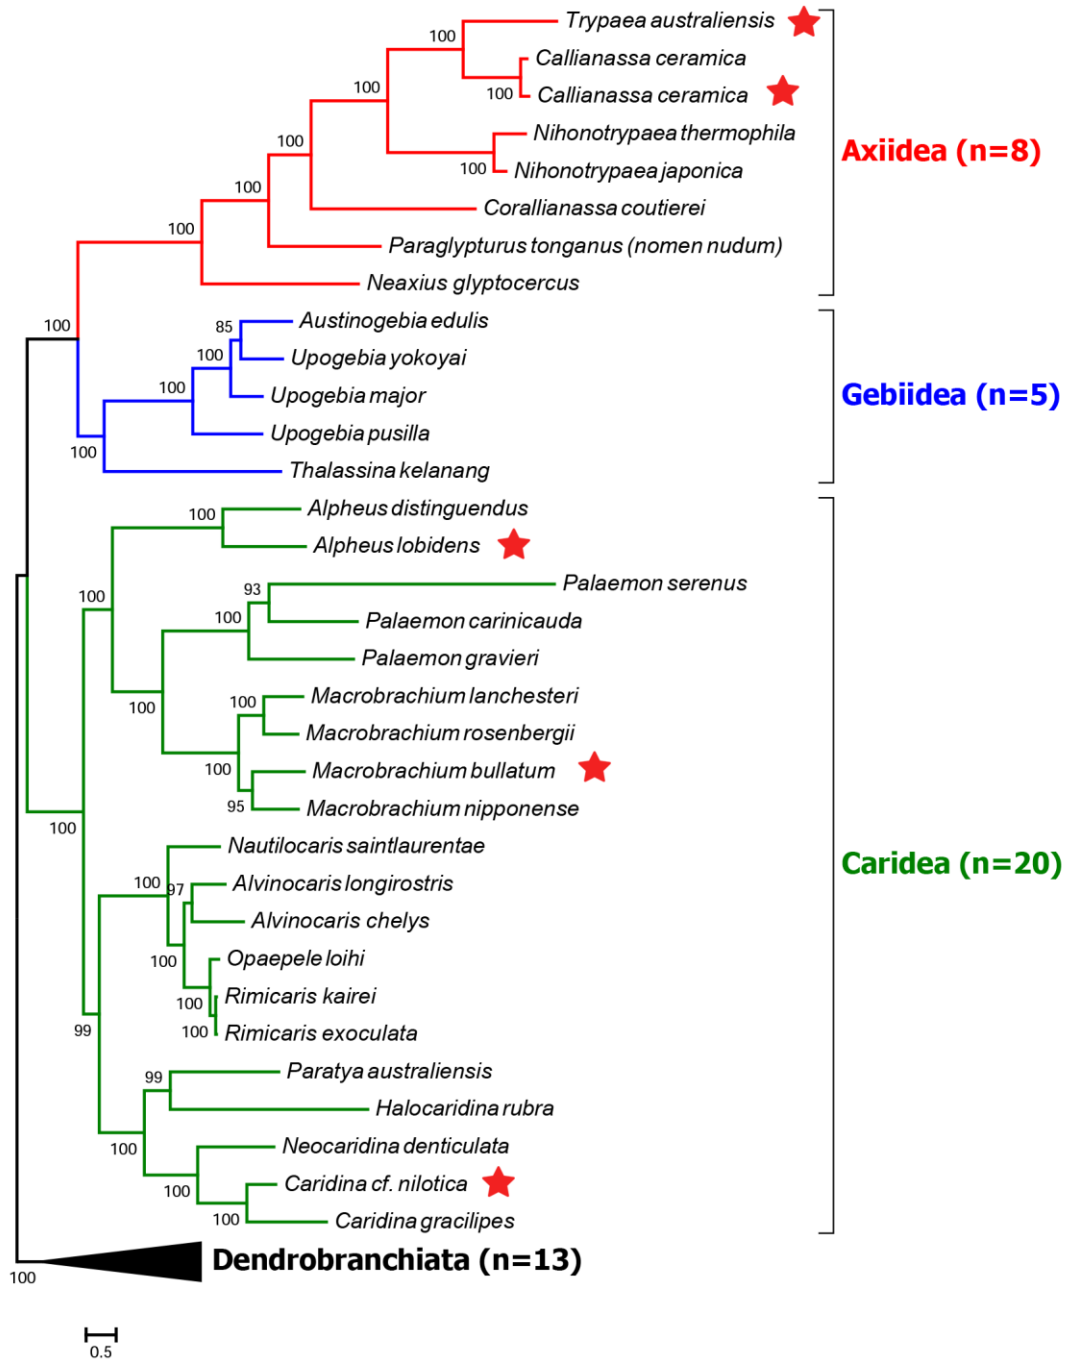

13 PCG (nt) – partitioned by codon – BI

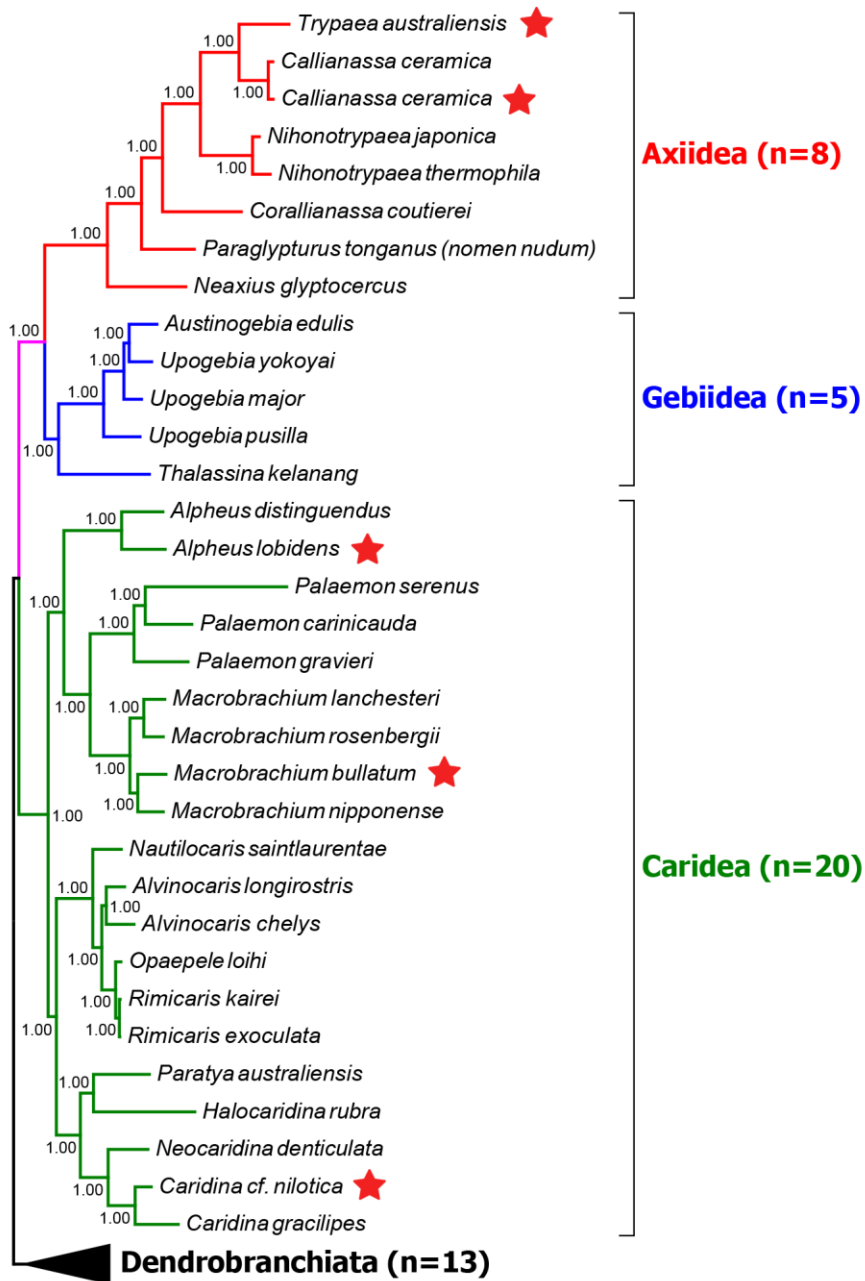

0.5

13 PCG (aa) + 12S + 16S – ML

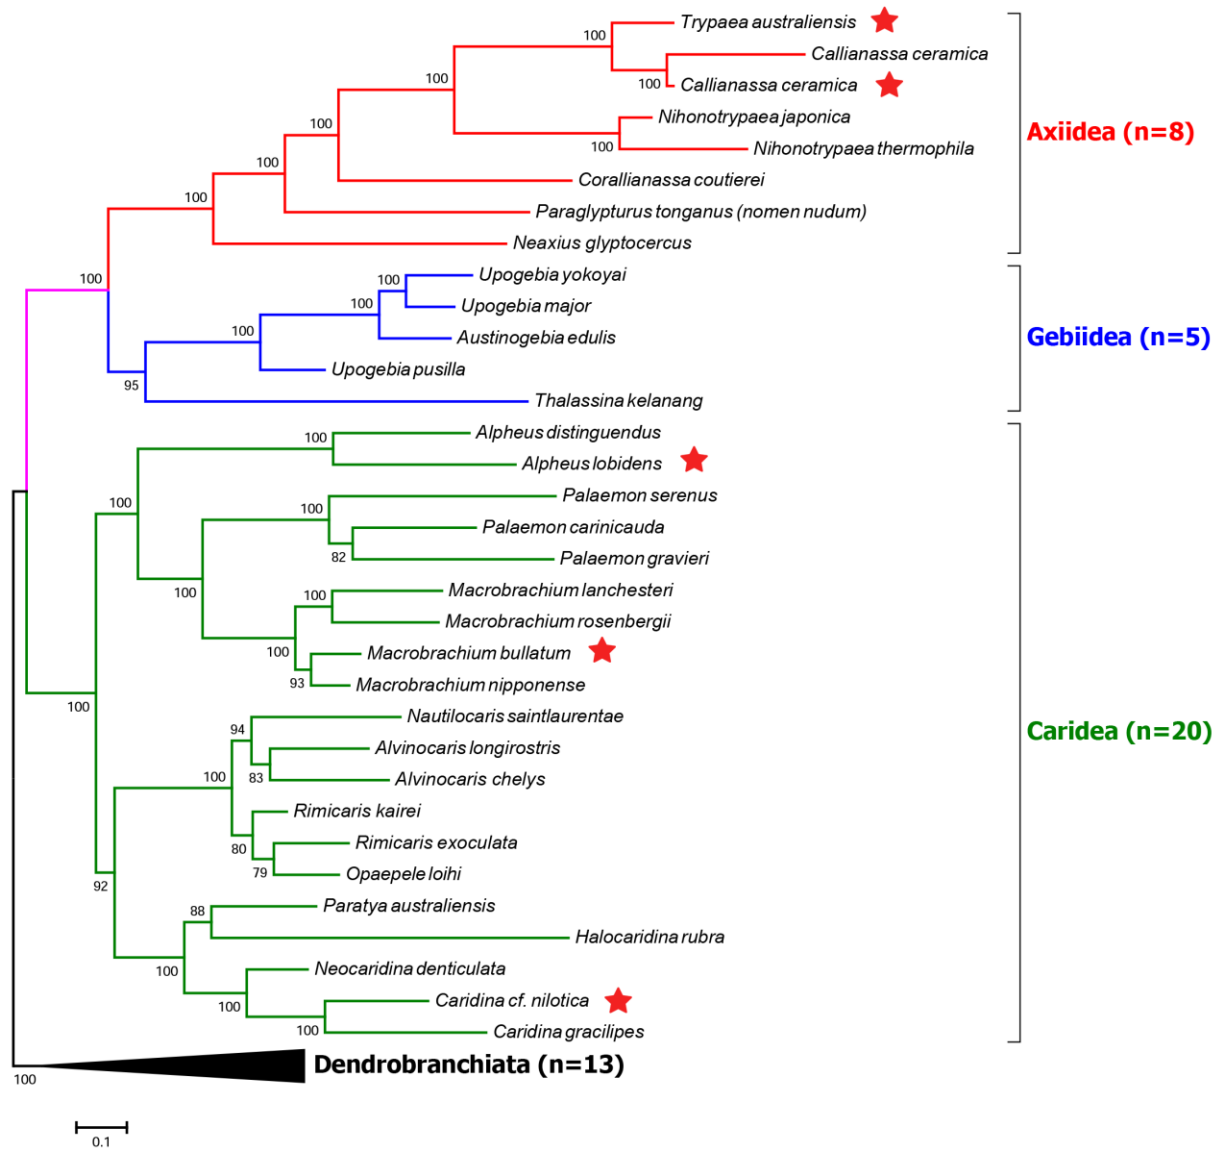

13 PCG (aa) + 12S + 16S – BI

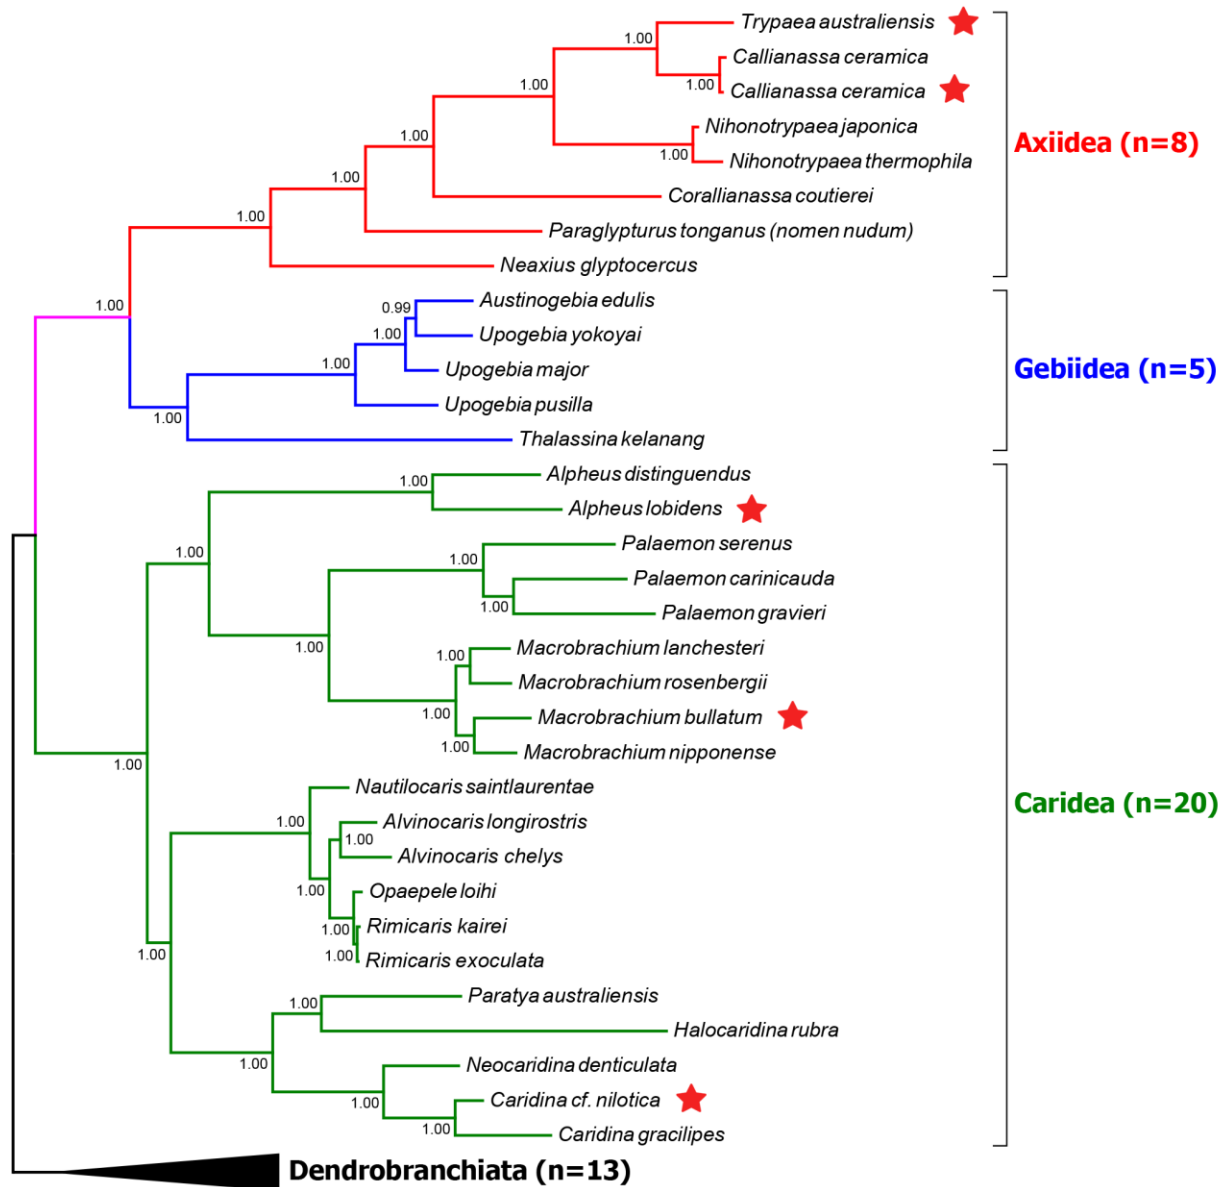



13 PCG (nt) + 12S + 16S – ML

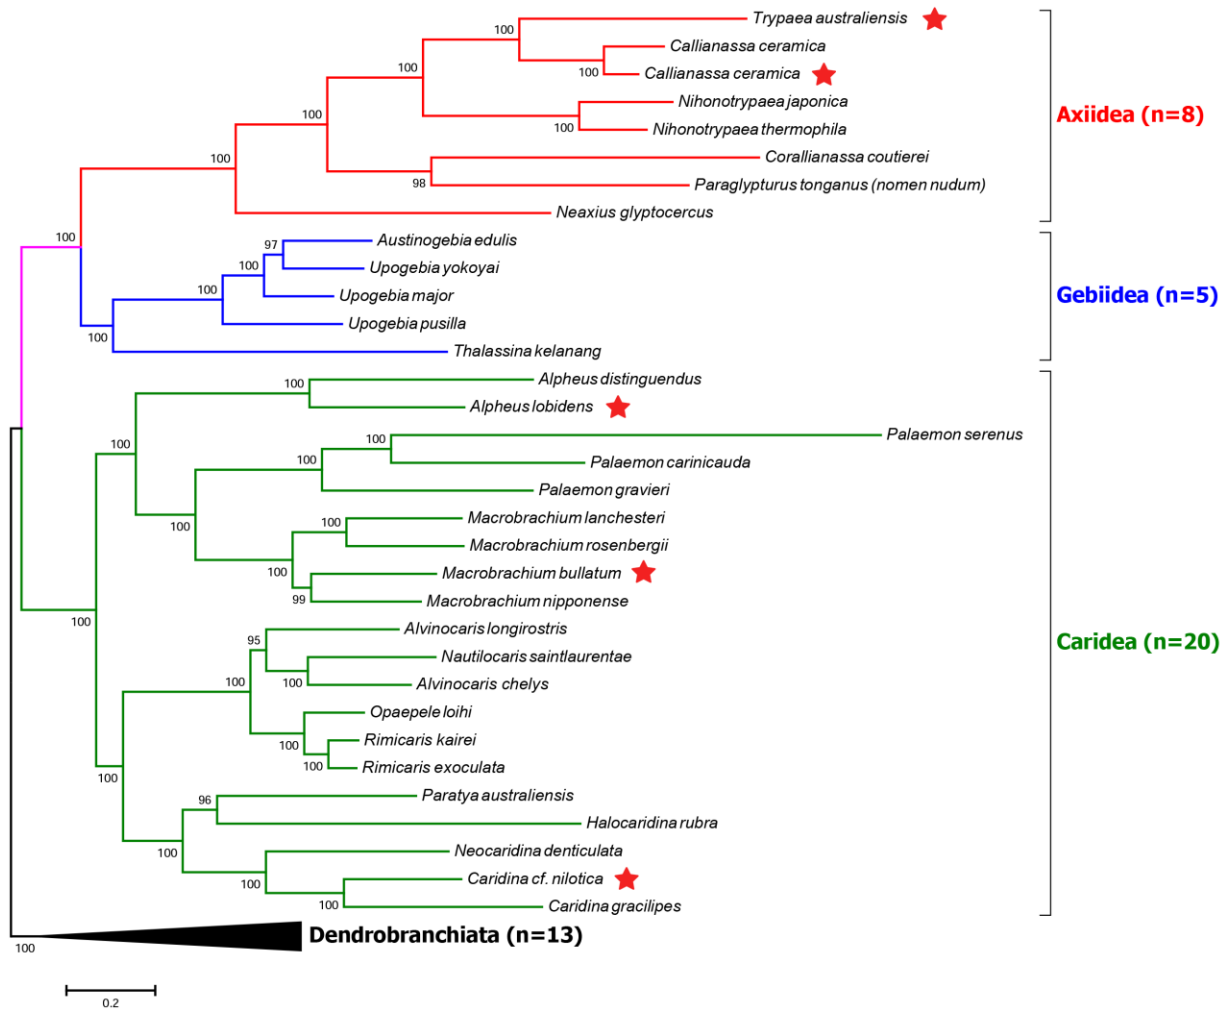

# 13 PCG (nt) + 12S + 16S – BI

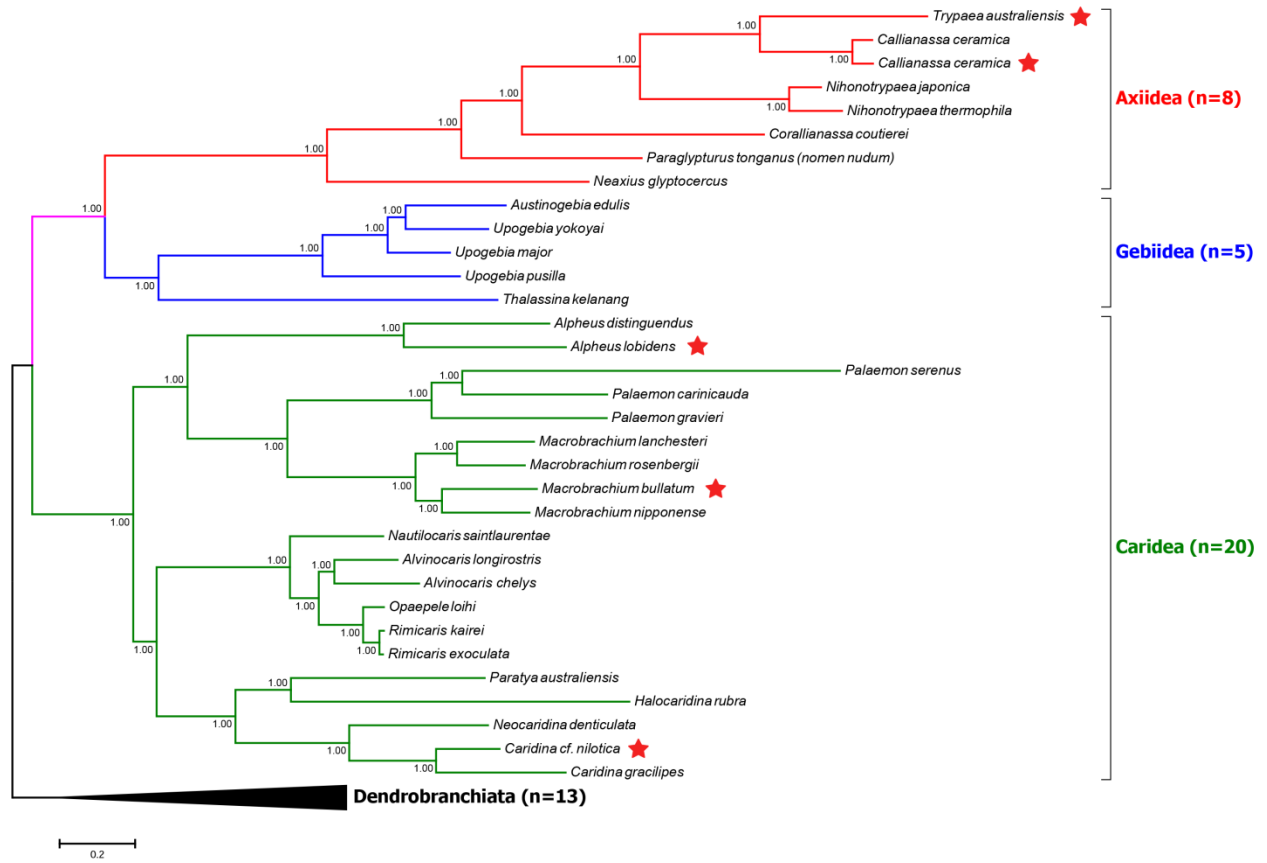

Supplement: peerj-05-2982-s008.pdf [file peerj-05-2982-s008.pdf]
