# Supplementary material for: Digging deeper: new gene order rearrangements and distinct patterns of codons usage in mitochondrial genomes among shrimps from the Axiidea, Gebiidea and Caridea (Crustacea: Decapoda)
Source: PubMed Central journal article supplement (PMC5335691; doi:10.7717/peerj.2982), 2017-03-01

Ax1 Ax2 Gr

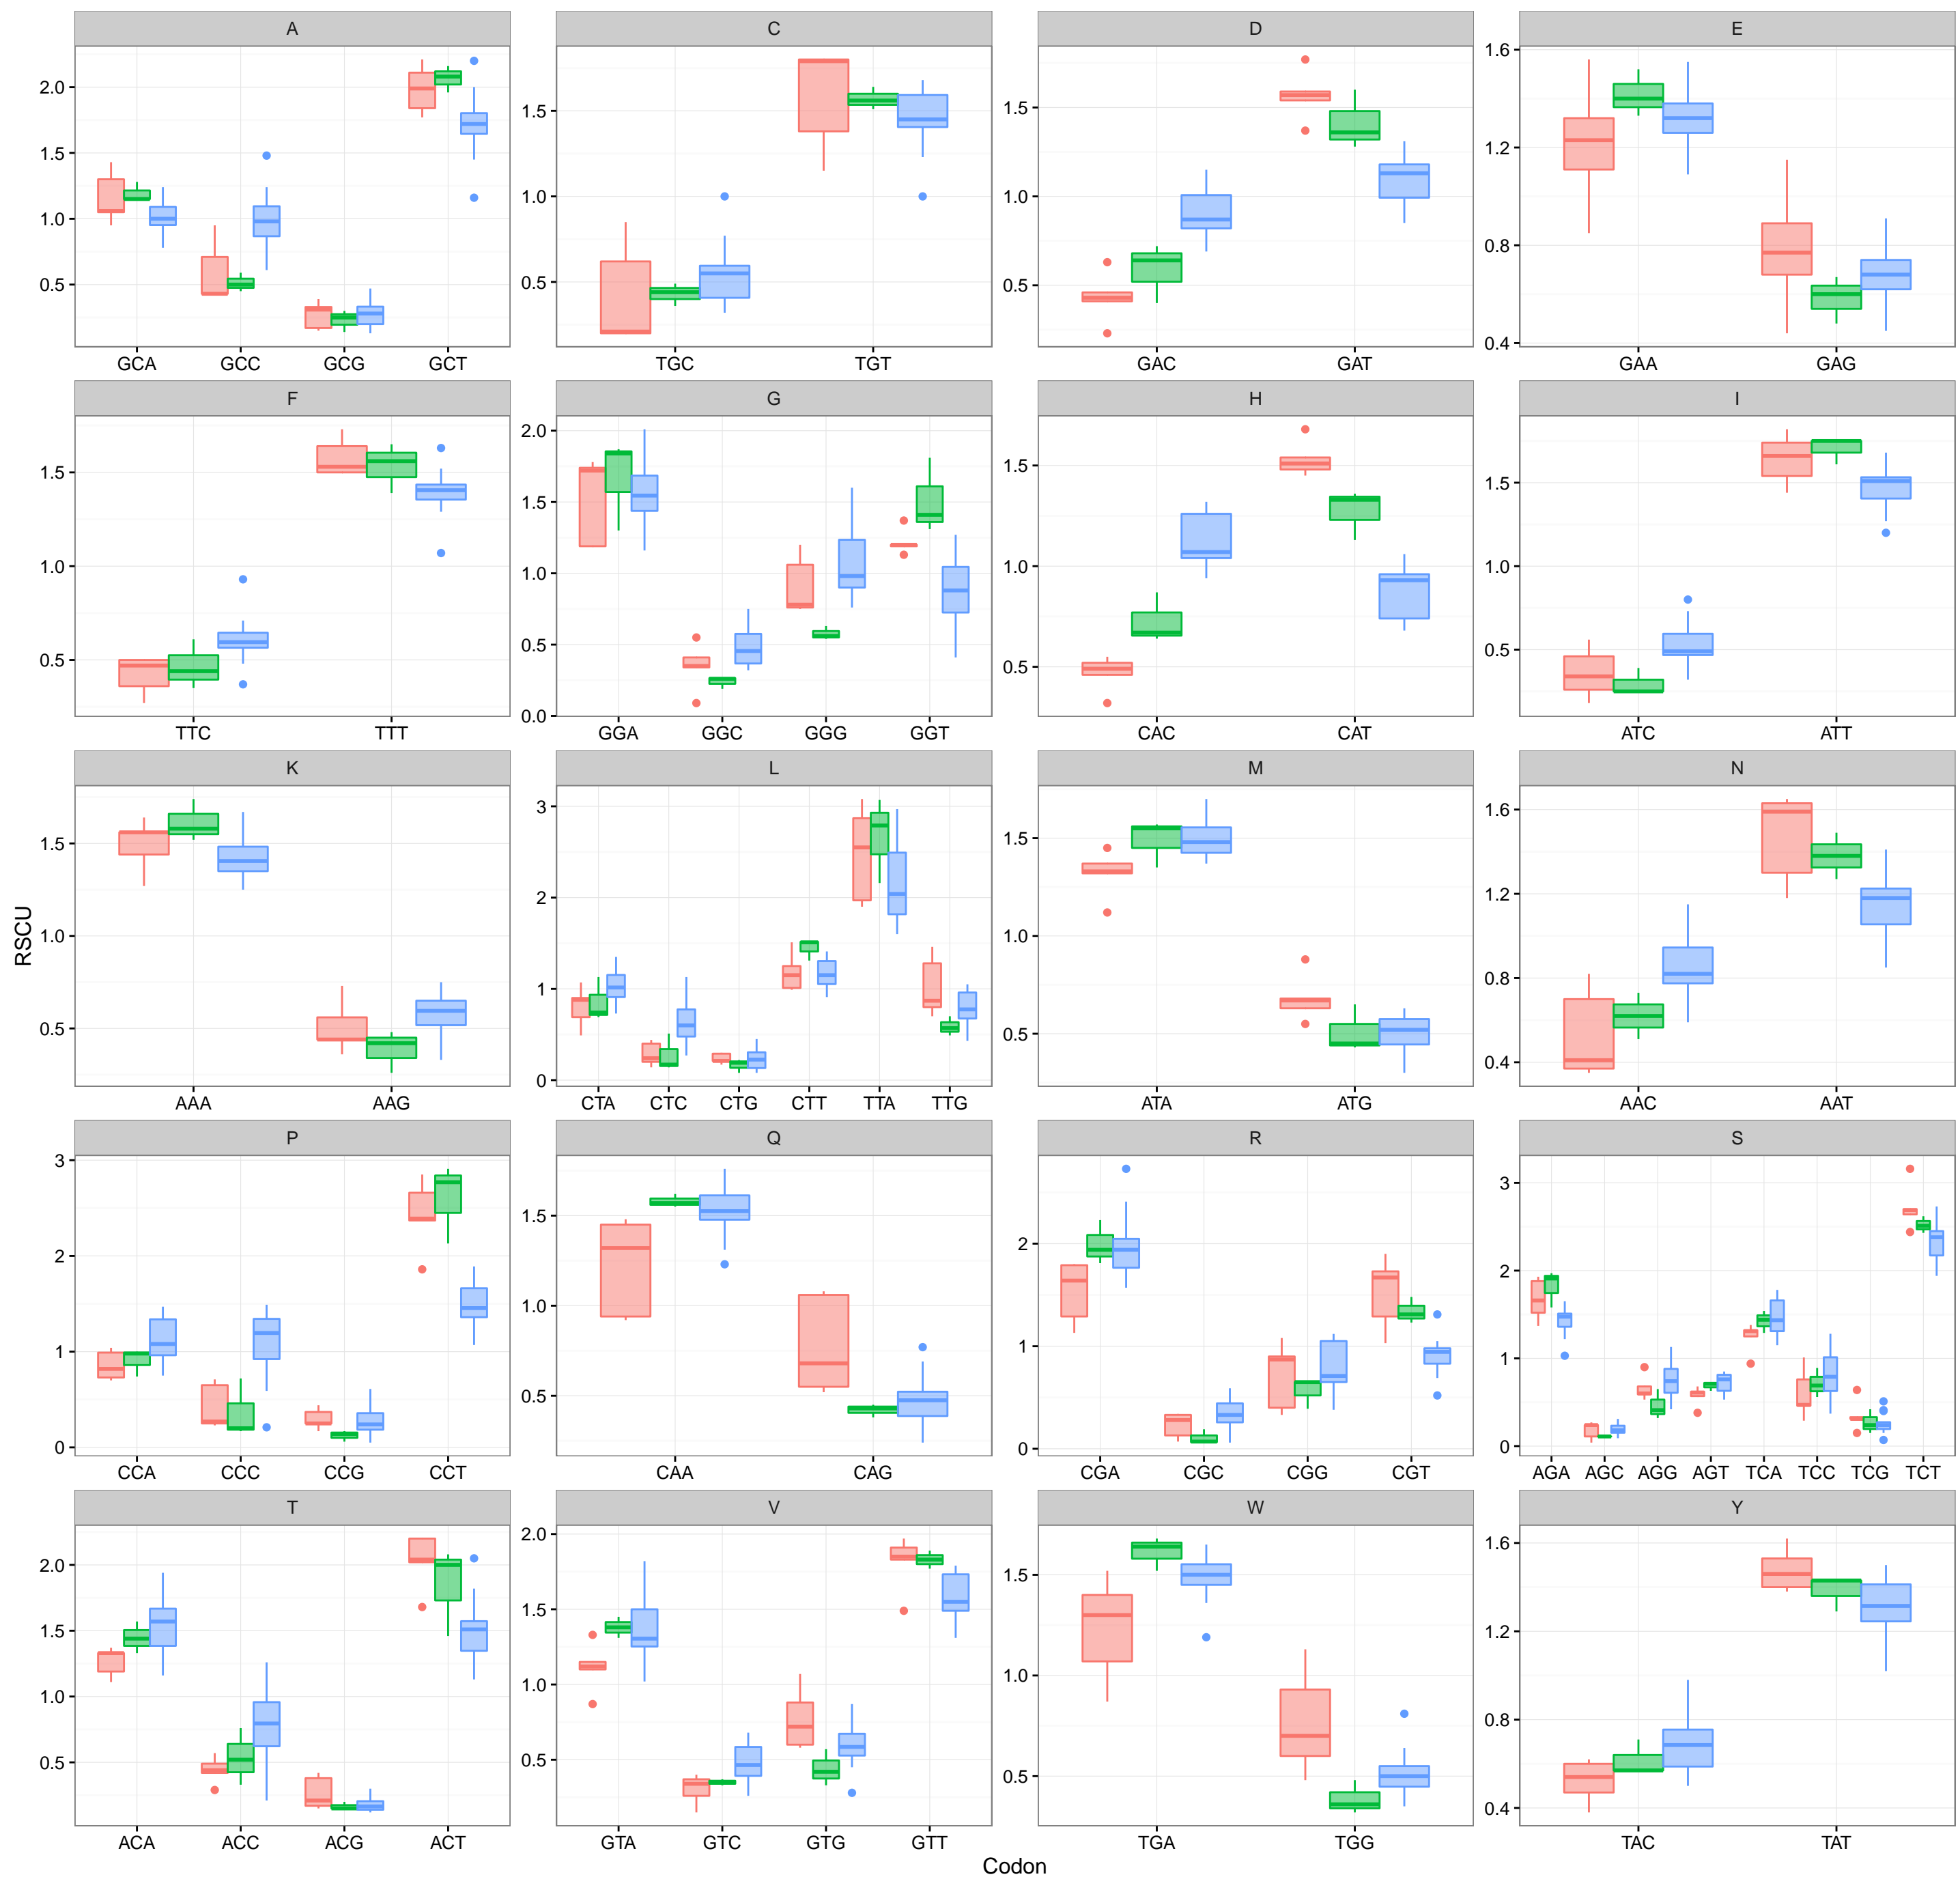

Supplement: peerj-05-2982-s009.pdf [file peerj-05-2982-s009.pdf]
