# Supplementary material for: Digging deeper: new gene order rearrangements and distinct patterns of codons usage in mitochondrial genomes among shrimps from the Axiidea, Gebiidea and Caridea (Crustacea: Decapoda)
Source: PeerJ. 2017 Mar 1;5:e2982. doi: 10.7717/peerj.2982 (PMC5335691; doi:10.7717/peerj.2982)
Supplement: Supplemental Information 2 [file peerj-05-2982-s002.xlsx]

## Sheet: Sheet1
Infraorder	Accession	Species	# PCG	# rRNA	# tRNA	mtDNA length	%AT	control region length
Caridea	KU726823	Caridina cf. nilotica	13	2	22	15497	64.45	675
Caridea	NC_024751	Caridina gracilipes	13	2	22	15550	63.36	612
Caridea	NC_023823	Neocaridina denticulata	13	2	22	15561	66.7	672
Caridea	NC_008413	Halocaridina rubra	13	2	22	16065	63.18	1020
Caridea	NC_027603	Paratya australiensis	13	2	22	15990	68.71	1006
Caridea	NC_027116	Rimicaris exoculata	13	2	22	15902	65.69	1022
Caridea	NC_020310	Rimicaris kairei	13	2	22	15900	65.81	1023
Caridea	NC_020311	Opaepele loihi	13	2	22	15905	65.66	1005
Caridea	NC_018778	Alvinocaris chelys	13	2	22	15910	63.35	1002
Caridea	NC_020313	Alvinocaris longirostris	13	2	22	16050	62.18	1136
Caridea	NC_021971	Nautilocaris saintlaurentae	13	2	22	15928	66.89	1018
Caridea	NC_012217	Macrobrachium lanchesteri	13	2	22	15694	67.09	861
Caridea	NC_015073	Macrobrachium nipponense	13	2	22	15806	66.04	950
Caridea	NC_027602	Macrobrachium bullatum	13	2	22	15774	64.58	998
Caridea	NC_006880	Macrobrachium rosenbergii	13	2	22	15772	62.27	931
Caridea	NC_012566	Palaemon carinicauda	13	2	22	15730	63.59	886
Caridea	NC_027601	Palaemon serenus	13	2	22	15967	58.97	1148
Caridea	NC_029240	Palaemon gravieri	13	2	22	15740	67.42	948
Caridea	KP276147	Alpheus lobidens	13	2	23	15735	58.86	879
Caridea	NC_014883	Alpheus distinguendus	13	2	22	15700	60.17	890
Gebiidea	NC_019608	Thalassina kelanang	13	2	22	15528	66.32	713
Gebiidea	NC_019606	Austinogebia edulis	13	2	22	15761	73.63	764
Gebiidea	NC_019607	Upogebia major	13	2	22	16143	70.68	920
Gebiidea	NC_020023	Upogebia pusilla	13	2	22	15680	70.85	652
Gebiidea	NC_025943	Upogebia yokoyai	13	2	22	16063	71.99	811
Axiidea	NC_019609	Neaxius glyptocercus	13	2	22	14909	67.41	91
Axiidea	NC_024651	Paraglypturus tonganus (nomen nudum)	13	2	22	15924	66.14	1035
Axiidea	NC_020025	Corallianassa coutierei	13	2	22	15481	64.75	610
Axiidea	NC_019610	Nihonotrypaea thermophila	13	2	22	15240	69.6	546
Axiidea	NC_020351	Nihonotrypaea japonica	13	2	22	15274	70.29	549
Axiidea	KU350630	Callianassa ceramica	13	2	22	16899	69.69	2036
Axiidea	KU362925	Callianassa ceramica	13	2	22	16821	70.24	1977
Axiidea	NC_026225	Trypaea australiensis	13	2	22	15485	67.22	587
